# Supplementary material for: Synthesis and characterization of fluorescent oligo(3,4,5-triethoxycarbonyl-2-pyrazoline)
Source: Royal Society of Chemistry journal article supplement (doi:10.1039/c4py00315b), 2014-04-11
Supplement: c4py00315b1.pdf [file c4py00315b1.pdf]

# **Synthesis and Characterization of Fluorescent Oligo(3,4,5-Triethoxycarbonyl-2-Pyrazoline)**

Xiangxiang Jia, Yan Li, Longqiang Xiao, Lijian Liu\*

Key Laboratory of Biomedical Polymers, Ministry of Education

College of Chemistry and Molecular Sciences, Wuhan University, Wuhan, 430072, China

Supporting information

---

**Supplementary text**

The Beer-Lambert law (i.e., Beer's law) states that

$$A=abc. \quad (1)$$

where A represents absorbance, a and b are constants representing absorptivity and the path length respectively and c represents the concentration.<sup>1</sup> Herein we use the relative peak area (S) to express the real-time concentration of the reagent to some degree. According to Beer's law, the correlation between S and the actual concentration (a-x) of reagents could be stated as expressed below:

$$a-x=rS \quad (2)$$

where a refers to the original concentration, x refers to the real-time concentration of the product and r refers to a constant.

## Characterizations of 3,4,5-triethoxycarbonyl-2-pyrazoline

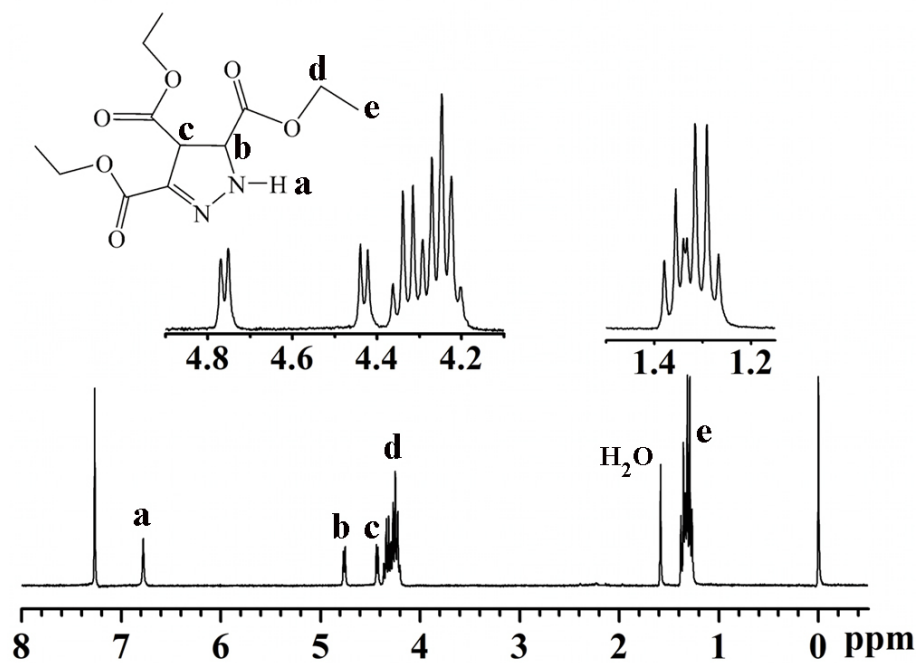Figure S1. <sup>1</sup>H NMR spectrum of 3,4,5-triethoxycarbonyl-2-pyrazoline.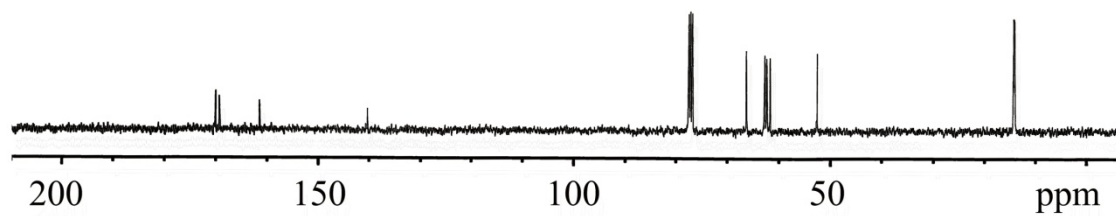Figure S2. <sup>13</sup>C NMR spectrum of 3,4,5-triethoxycarbonyl-2-pyrazoline.

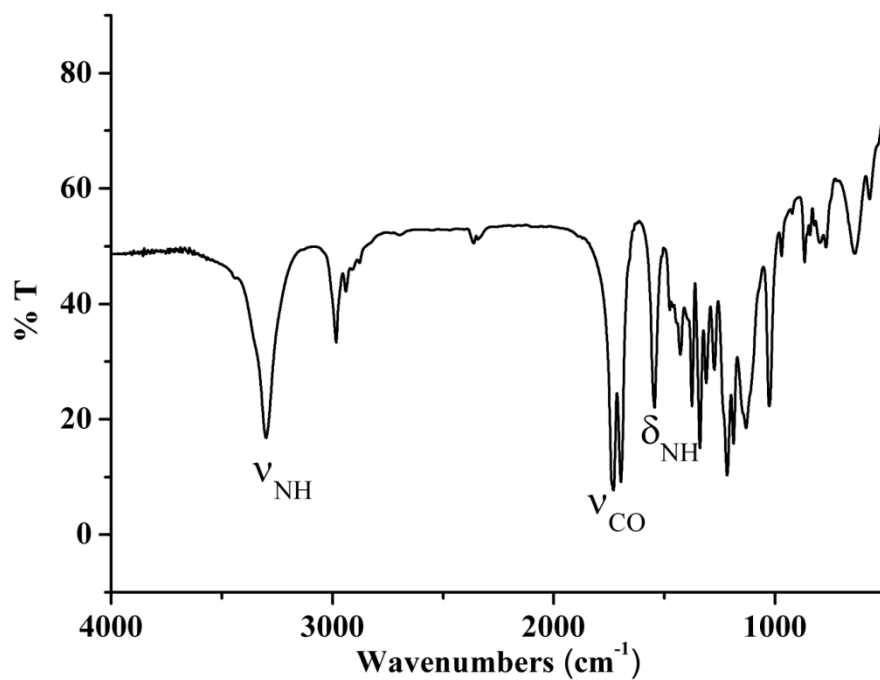

**Figure S3.** FT-IR spectrum of 3,4,5-triethoxycarbonyl-2-pyrazoline.

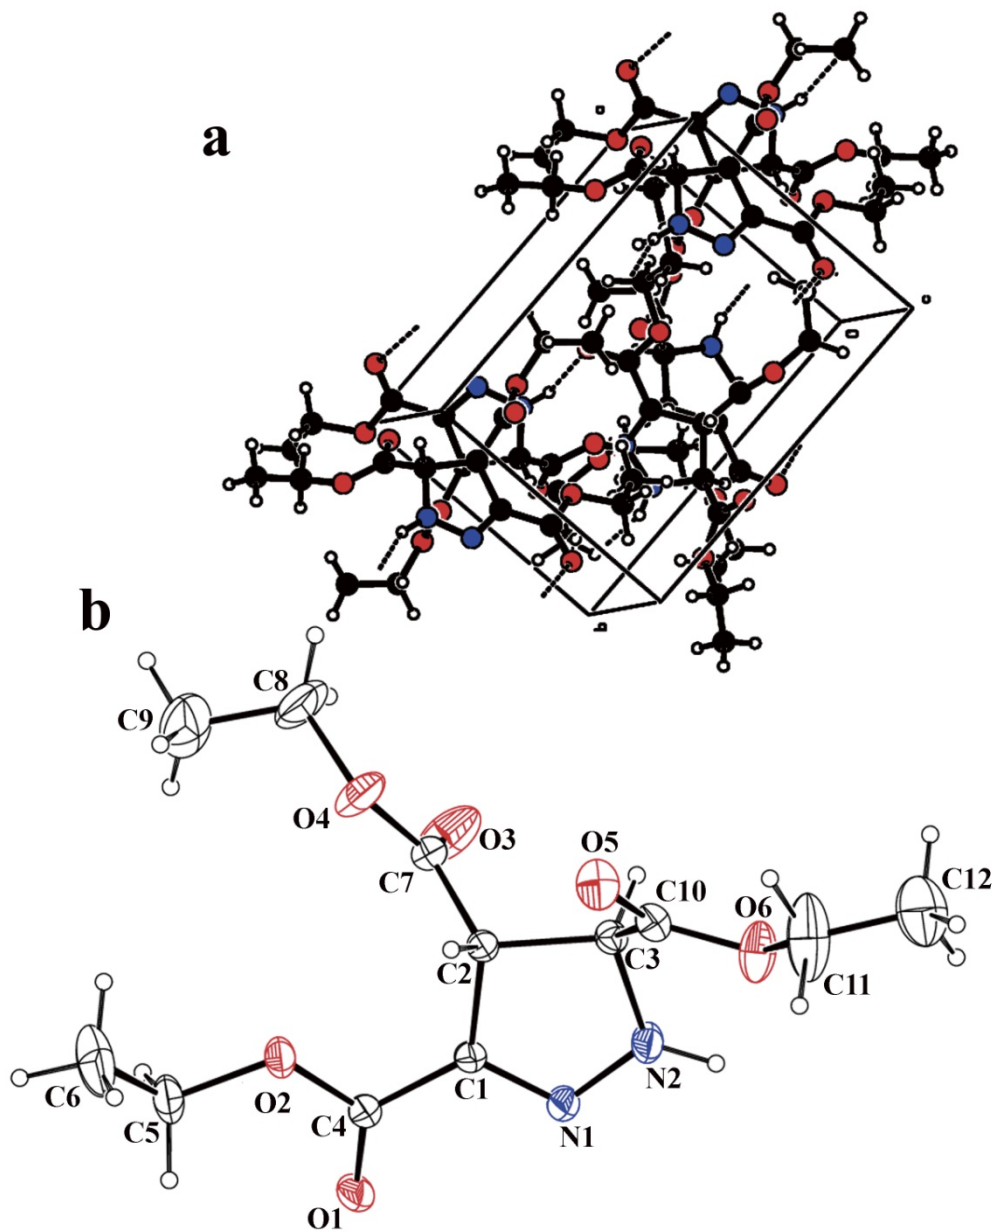

**Figure S4.** Molecular structure of 3,4,5-triethoxycarbonyl-2-pyrazoline characterized by single-crystal X-ray diffraction.

## ON-line FT-IR characterization of the reaction of EDA

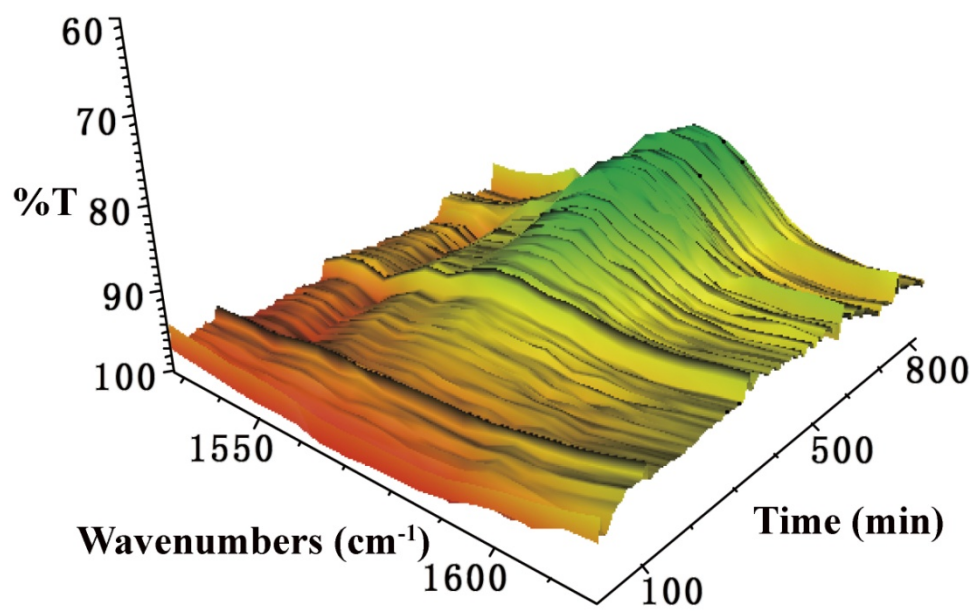

**Figure S5.** On-line FT-IR spectrum of the reaction synthesizing 3,4,5-triethoxycarbonyl-2-pyrazoline for the band near 1565 cm<sup>-1</sup>.

## DSC analysis of 3,4,5-triethoxycarbonyl-2-pyrazoline and comparisons of NMR and FT-IR spectra of oligomers and monomer

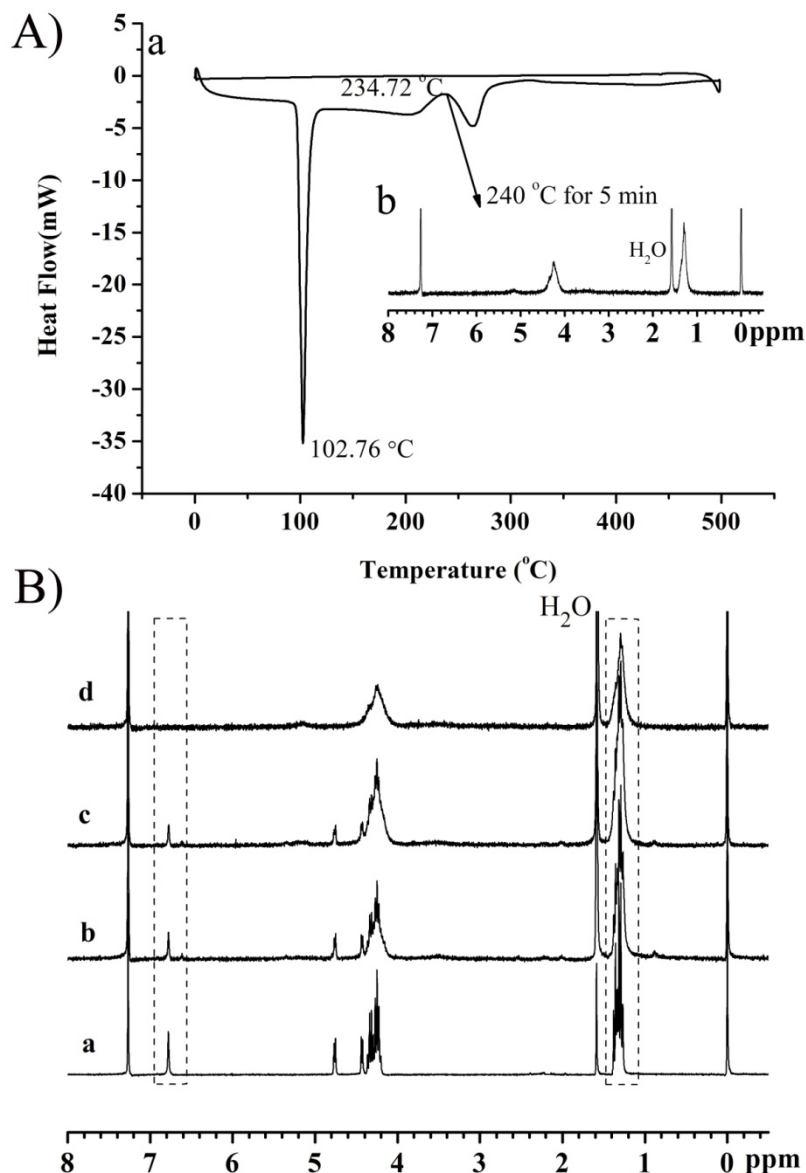

**Figure S6.** A) DSC curve of 3,4,5-triethoxycarbonyl-2-pyrazoline (a) and the corresponding <sup>1</sup>H NMR spectrum of the sample heated from -10 to 240 °C and hold for 5 min (b). B) <sup>1</sup>H NMR spectra of samples after DSC detection at different temperature for different isothermal time (a: 2-pyrazoline with  $I_{\text{NH}}/I_{\text{CH}_3}=0.0955$ ; b: the sample heated from -10 to 240 °C and then cooled to 0 °C at a rate of 15 °C/min,  $I_{\text{NH}}/I_{\text{CH}_3}=0.0538$ ; c: the sample heated from -10 to 210 °C, hold for 15 min and then cooled to 0 °C at the same rate,  $I_{\text{NH}}/I_{\text{CH}_3}=0.0384$ ; d: the sample heated from -10 to 240 °C, hold for 5 min and then cooled to 0 °C at the same rate).  $I_{\text{CH}_3}$ : the nuclear magnetic resonance integration value of CH<sub>3</sub> in all.  $I_{\text{NH}}$ : the nuclear magnetic resonance integration value of NH marked by rectangles.

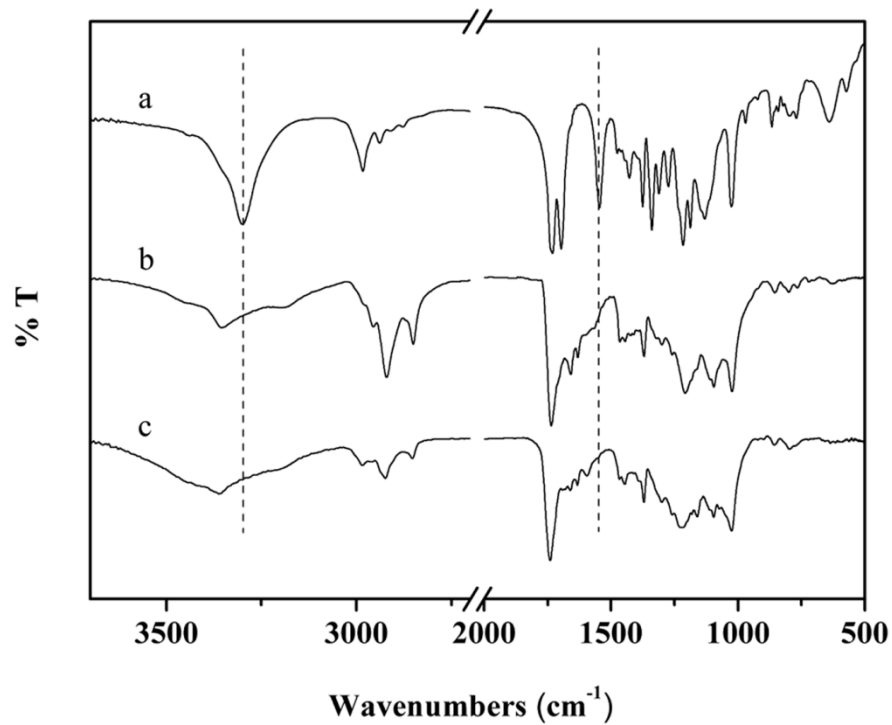

**Figure S7.** FT-IR spectra of samples after DSC detection at different temperatures for different isothermal time (a: 2-pyrazoline; b: the sample heated from -10 to 240 °C and then cooled to 0 °C at a rate of 15 °C/min; c: the sample heated from -10 to 240 °C, hold for 5 min and then cooled to 0 °C at the same rate).



**Characterizations of the obtained oligomers**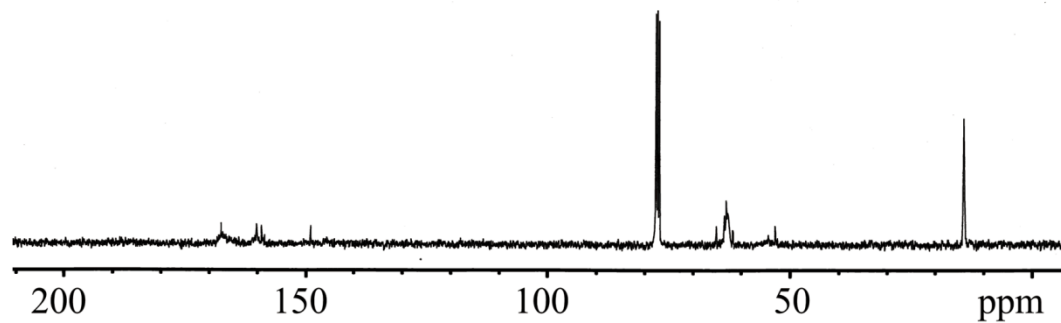**Figure S8.**  $^{13}\text{C}$  NMR spectrum of the obtained oligomer.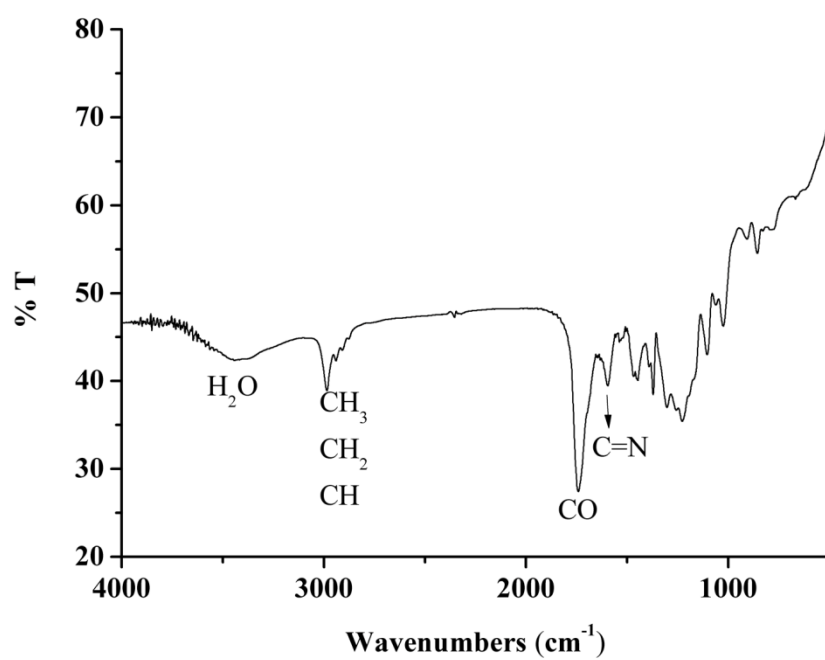**Figure S9.** FT-IR spectrum of the obtained oligomer.

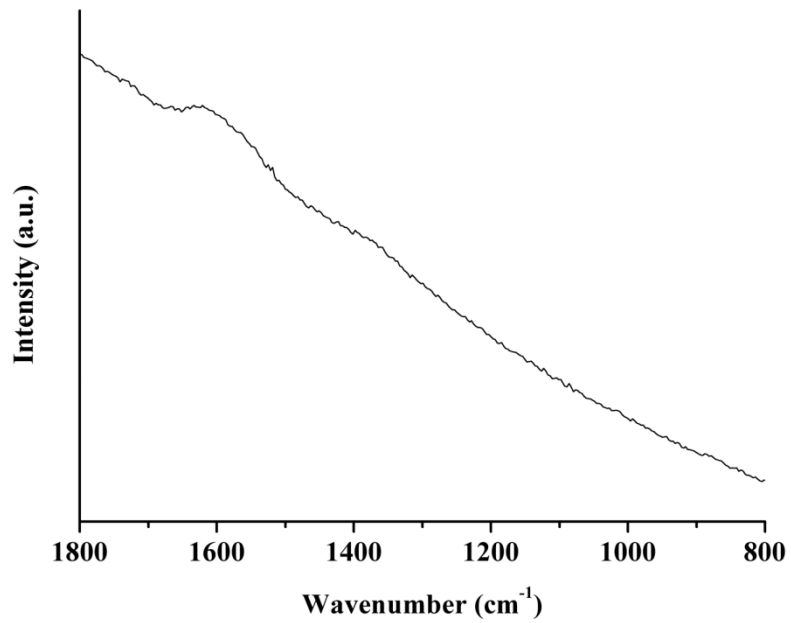

**Figure S10.** Raman spectrum of the obtained oligomer.

MALDI-TOF-MS analysis of the obtained oligomer catalyzed by  $\text{Rh}_2(\text{OAc})_4$ 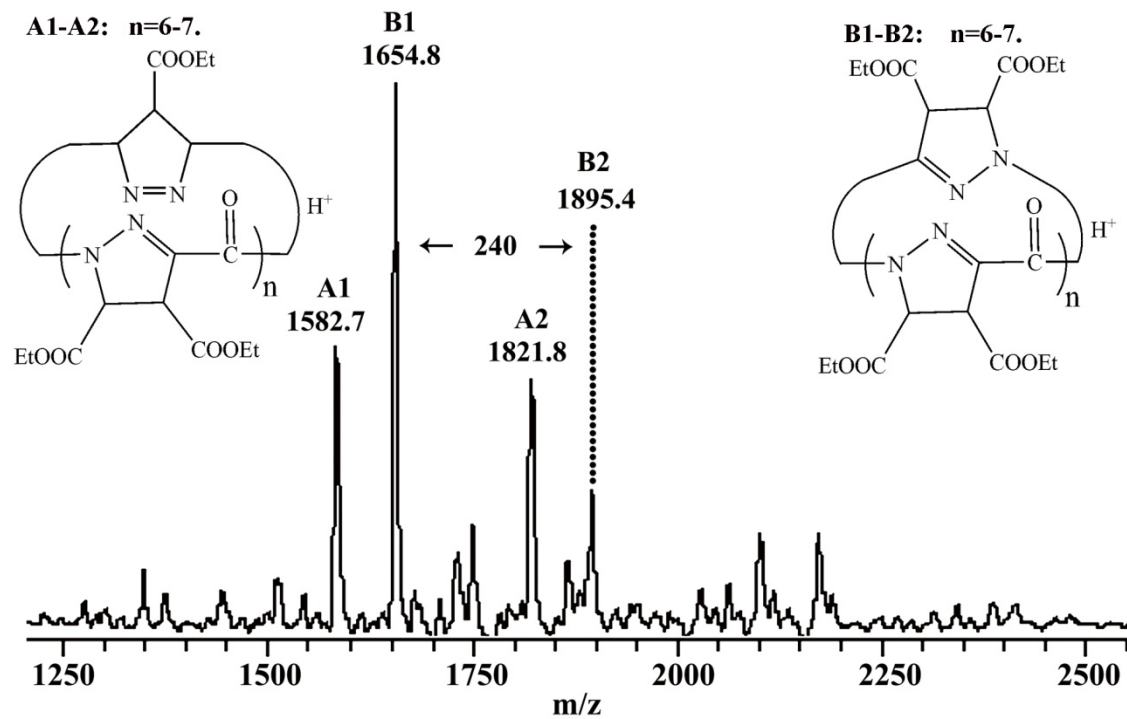Figure S11. MALDI-TOF-MS spectrum of the oligomer catalyzed by  $\text{Rh}_2(\text{OAc})_4$ .

**Cell culture experiments of the monomer and oligomer**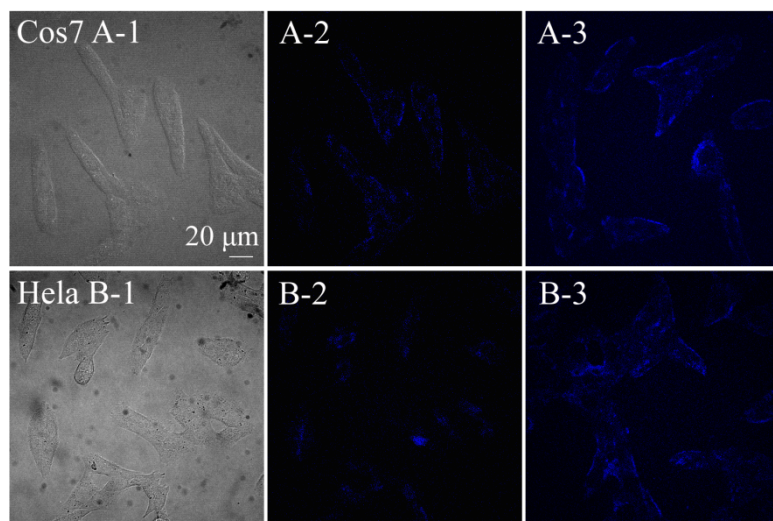

**Figure S12.** Bright field and confocal fluorescence micrographs at a laser excitation of 405 nm. Line A and B are Cos7 and HeLa cells respectively. A-1, A-2, B-1, B-2 are bright field and corresponding fluorescence images of 3,4,5-triethoxycarbonyl-2-pyrazoline. A-3 and B-3 are fluorescence images of the oligomer catalyzed by  $\text{Sn}(\text{Oct})_2$ .

## DSC curves of the oligomers

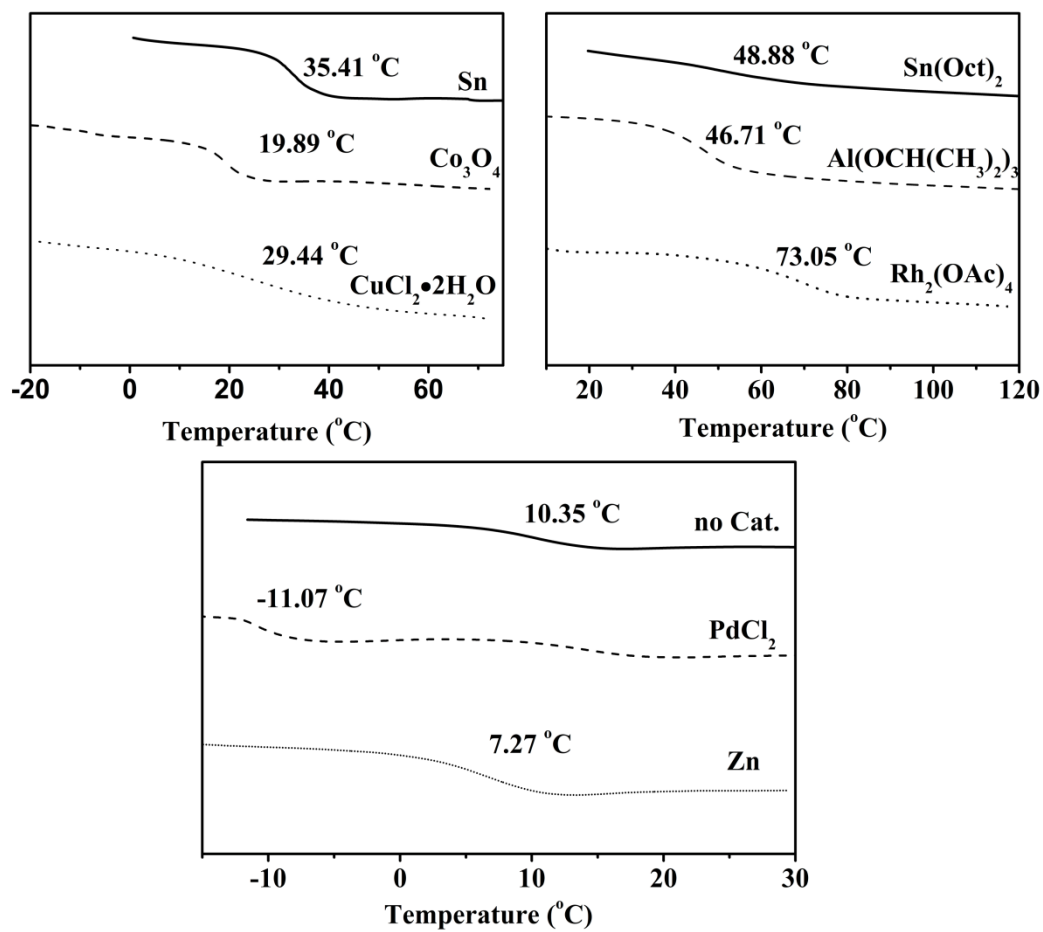

**Figure S13.** DSC curves of the oligomers with different catalysts.

## Cytotoxicity experiment

The cell toxicity of the monomer and the oligomer product was examined by MTT assay. The Cos7 cells and Hela cells were seeded in the 96-well plate with a density of  $5 \times 10^4$  cells per well and cultured 24 h in 100  $\mu$ L DMEM containing 10% FBS respectively. After coincubation with the materials to be detected for 48 h, the medium was replaced with 200  $\mu$ L of fresh medium. Then 20  $\mu$ L of MTT (5 mg/mL) solution was added in and further incubated at 37  $^{\circ}$ C for 4 h. After that, the medium was removed and 150  $\mu$ L DMSO was added in. A microplate reader (BIO-RAD 550) was used to measure the absorbance of the medium at 570 nm. The relative cell viability was calculated as followed:

$$\text{Relative cell viability (\%)} = (\text{OD}_{570}(\text{sample})/\text{OD}_{570}(\text{control})) \times 100$$

where  $\text{OD}_{570}(\text{sample})$  was obtained in the presence of the product,  $\text{OD}_{570}(\text{control})$  was obtained in the absence of the product. Data were shown as mean  $\pm$  standard deviation (SD) based on triplicate independent experiments.

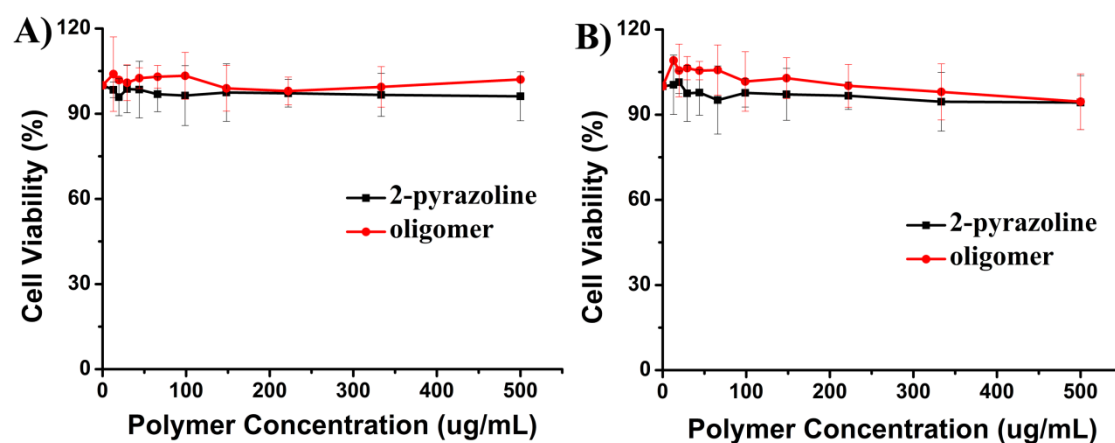

**Figure S14.** The cytotoxicity of the 2-pyrazoline and oligomer catalyzed by  $\text{Sn}(\text{Oct})_2$  with Cos7 (A) and Hela (B) cells.

## Quantum yields and fluorescence lifetime of the oligomers

The quantum yields are calculated using the following formula:

$$Q = Q_R \frac{I \text{OD}_R n^2}{I_R \text{OD} n_R^2}$$

with quinine sulfate as the standards for the measurement where Q is the quantum yield, I is the integrated fluorescence intensity, OD is the optical density and n is the refractive index. The subscript R represents the standard fluorophore. The quantum yield of quinine sulfate in 0.1 M H<sub>2</sub>SO<sub>4</sub> at 22 °C is 0.58 with the excitation of 350 nm.

**Table S1.** The quantum yields and fluorescence lifetime of oligomers with different catalysts

| Run | Catalyst                                             | Quantum yields (%) | Fluorescence lifetime |                       |          |
|-----|------------------------------------------------------|--------------------|-----------------------|-----------------------|----------|
|     |                                                      |                    | $\tau_1$ (ns)<br>(A%) | $\tau_2$ (ns)<br>(A%) | $\chi^2$ |
| 1   | No Cat.                                              | 16                 | 1.67<br>(53.54%)      | 6.41<br>(46.46%)      | 1.291    |
| 2   | PdCl <sub>2</sub>                                    | 22                 | 2.22<br>(62.16%)      | 7.74<br>(37.84%)      | 1.421    |
| 3   | Sn(Oct) <sub>2</sub>                                 | 22                 | 2.04<br>(58.29%)      | 5.72<br>(41.71%)      | 1.255    |
| 4   | Sn                                                   | 15                 | 1.90<br>(60.79%)      | 7.39<br>(39.21%)      | 1.076    |
| 5   | Al(OCH(CH <sub>3</sub> ) <sub>2</sub> ) <sub>3</sub> | 26                 | 2.40<br>(57.90%)      | 8.59<br>(42.10%)      | 1.503    |
| 6   | Rh <sub>2</sub> (OAc) <sub>4</sub>                   | 15                 | 2.55<br>(39.88%)      | 11.43<br>(60.12%)     | 1.233    |
| 7   | Co <sub>3</sub> O <sub>4</sub>                       | 13                 | 1.82<br>(45.81%)      | 11.07<br>(54.19%)     | 1.292    |
| 8   | Zn                                                   | 15                 | 1.58<br>(58.70%)      | 6.66<br>(41.30%)      | 1.316    |

## References

1. K. Fuwa and B. L. Valle, *Anal. Chem.*, 1963, **35**, 942-946.
